# Supplementary material
Source: Research Square preprint supplement (doi:10.21203/rs.3.rs-9903274/v1)
Supplement: Supplementary file 1 [file 0b16a77575f4d9c3504ea72d.docx]

**Supplementary Information (Appendix 1)**

**Table 4 Error terms of the model to predict entrepreneurs’ discovery and exploitation behaviors.**

|  | Estimate | S.E. | C.R. |
| --- | --- | --- | --- |
| e1 (market) | 0,459 | 0,037 | 12,381 |
| e2 (financing) | 0,448 | 0,034 | 13,347 |
| e3 (government) | 0,460 | 0,034 | 13,361 |
| e4 (society) | 0,722 | 0,055 | 13,103 |
| e5 (university) | 0,700 | 0,059 | 11,914 |
| e9 (exploitation) | 0,657 | 0,047 | 13,985 |
| e10 (discovery) | 0,480 | 0,040 | 11,931 |
| e11 (attitude) | 0,272 | 0,024 | 11,432 |
| e12 (self-efficacy) | 0,302 | 0,027 | 11,272 |
| e13 (financial literacy) | 0,462 | 0,035 | 13,020 |

**Table 5 Covariances of the model to predict entrepreneurs’ discovery and exploitation behaviors***.*

| Covariances | | | Estimate |
| --- | --- | --- | --- |
| Environment perception | ↔ | Individual profile | 0.823 |
| Environment perception | ↔ | Age | -0.091 |
| Individual profile | ↔ | Gender | 0.052 |
| Individual profile | ↔ | Age | -0.01 |
| Environment perception | ↔ | Gender | 0.062 |
| Age | ↔ | Gender | -0.116 |
| e2 (financing) | ↔ | e3 (government) | 0.217 |
| e3 (government) | ↔ | e4 (society) | 0.122 |
| e1 (market) | ↔ | e5 (society) | -0.21 |

*Note:* Covariances were included according to the modification indices only between error terms of variables from the same factor.

**Table 6** **Squared multiple correlations**

| Variable | Estimate |
| --- | --- |
| Discovery | 0,464 |
| Exploitation | 0,481 |
| Financial literacy | 0,47 |
| Self-efficacy | 0,598 |
| Attitude | 0,589 |
| Market | 0,377 |
| Financing | 0,348 |
| Government | 0,318 |
| Society | 0,373 |
| University | 0,419 |
